# Supplementary material for: A qualitative evaluation of the implementation of guidelines and a support tool for asthma management in primary care
Source: PubMed Central journal article supplement (PMC5142429; doi:10.1186/s40733-016-0023-9), 2016-05-04
Supplement: 40733_2016_23_MOESM2_ESM.pdf [file 40733_2016_23_MOESM2_ESM.pdf]

PATIENTS WITH ASTHMA AT RISK: TOOLS IMPLEMENTATION EVALUATION STUDY  
(PARTIES)

FOCUS GROUP DISCUSSION (Pharmacists)

SUMMARY SHEET

Please identify **in order of priority** what is important to you, considering today's discussion, regarding the Asthma Action Plan card.

1. Reasons to use the Asthma Action Plan card?

- a. \_\_\_\_\_
- b. \_\_\_\_\_
- c. \_\_\_\_\_

2. Reasons **NOT** to use the Asthma Action Plan card?

- a. \_\_\_\_\_
- b. \_\_\_\_\_
- c. \_\_\_\_\_

3. Any other comments?

---

---

---

---

---
